# Supplementary material for: p85β alters response to EGFR inhibitor in ovarian cancer through p38 MAPK-mediated regulation of DNA repair
Source: PubMed Central journal article supplement — Neoplasia. 2021 Jun 16;23(7):718–30. doi: 10.1016/j.neo.2021.05.009 (PMC8220107; doi:10.1016/j.neo.2021.05.009), 2021-06-16
Supplement: mmc1.pdf [file mmc1.pdf]

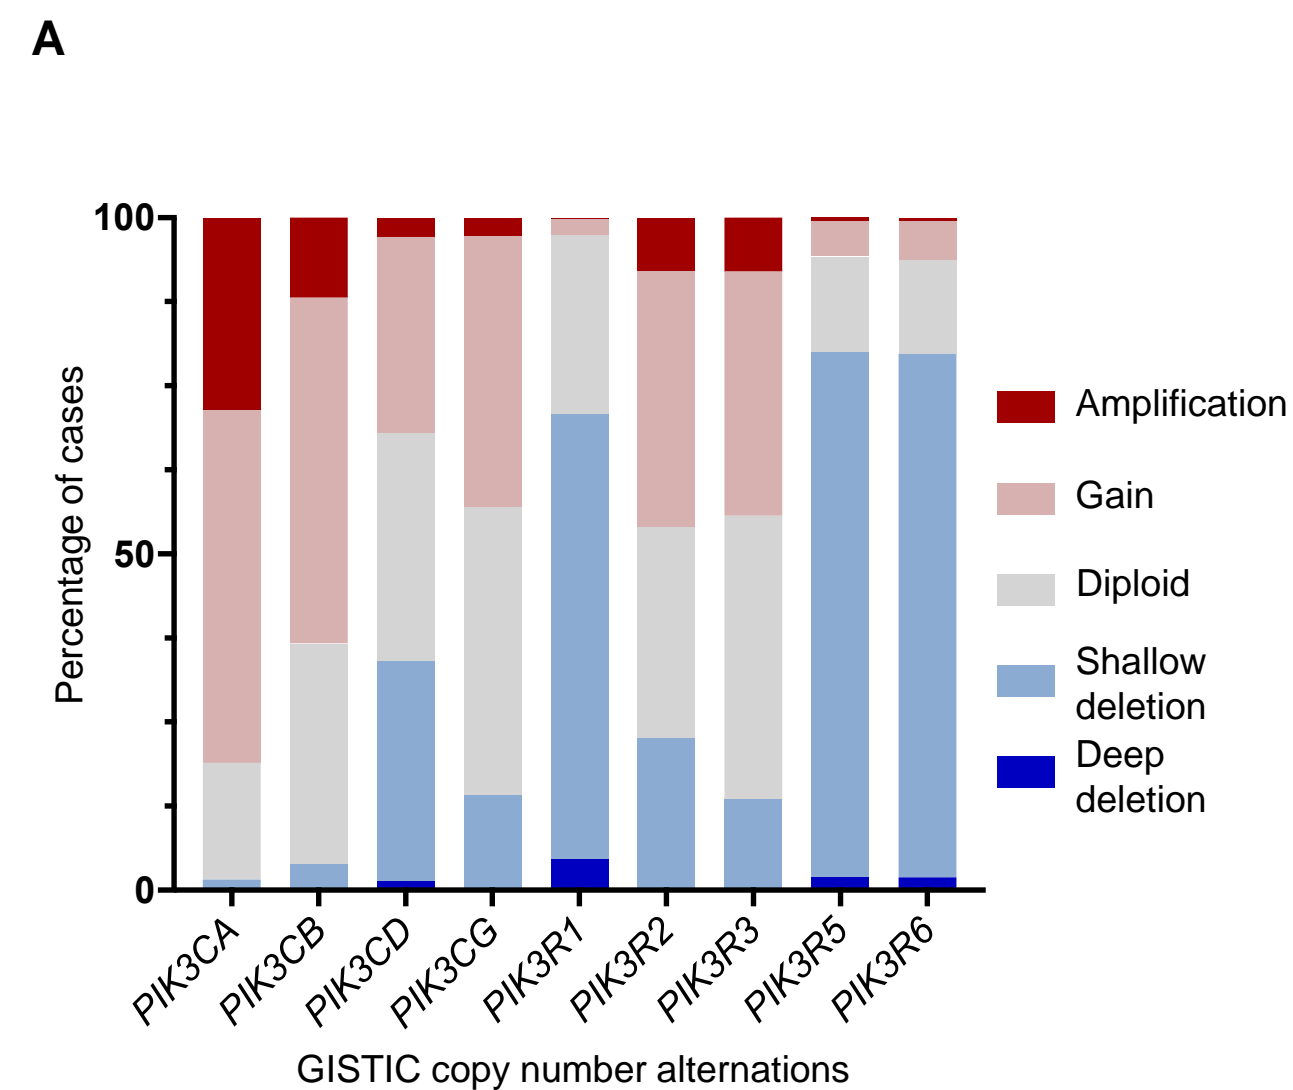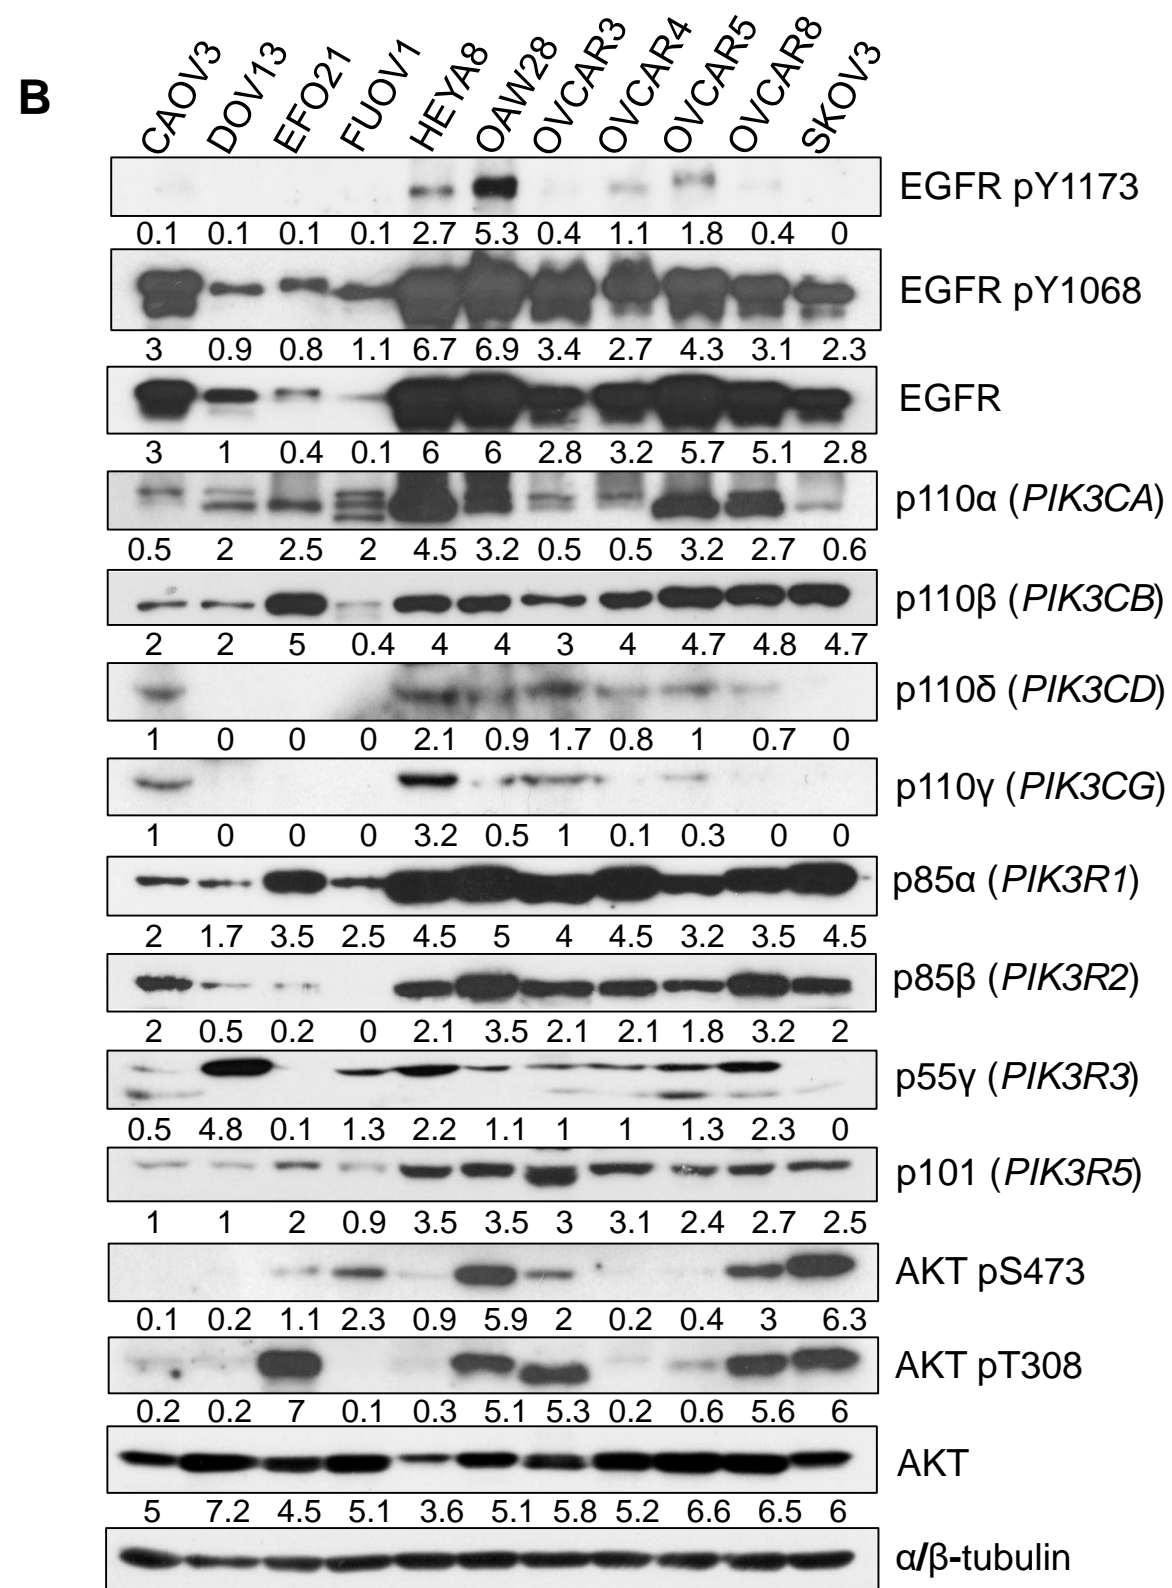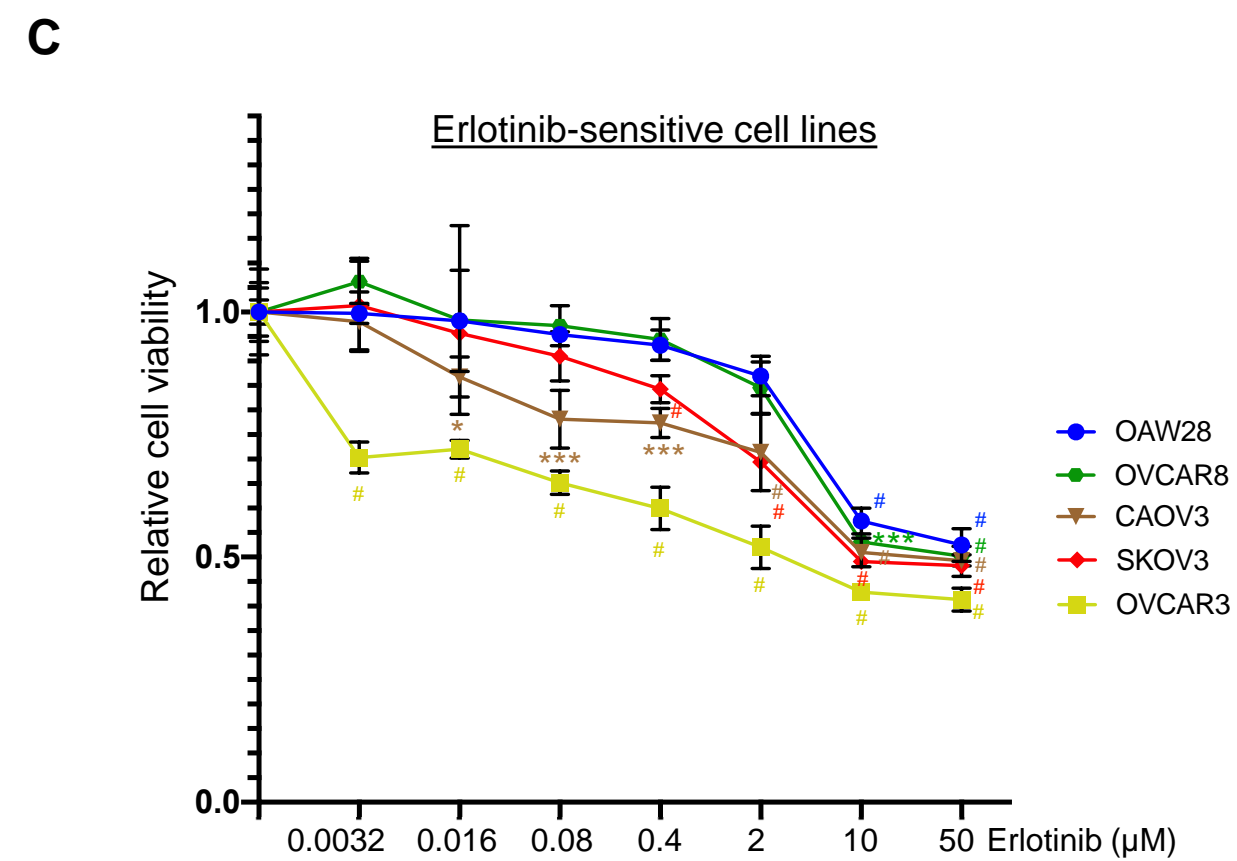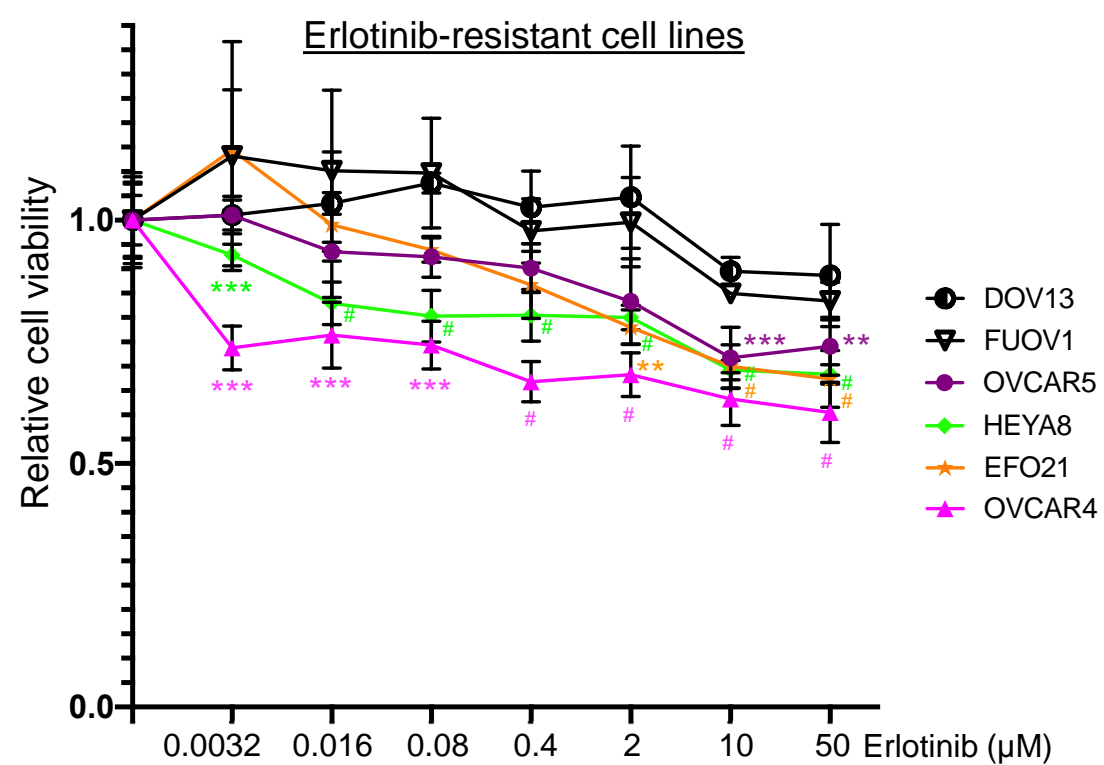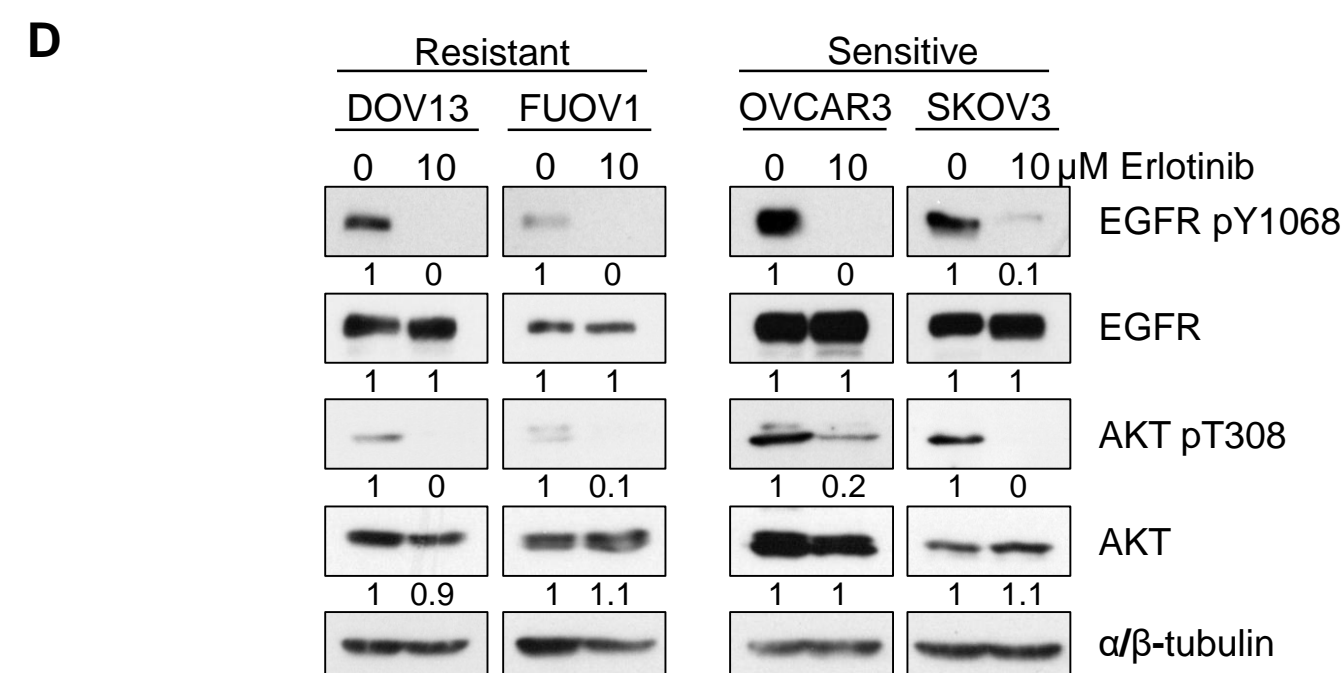

**Supplementary Figure 1. Expression levels of EGFR and PI3K isoforms as well as responses to erlotinib of ovarian cancer cell lines.**

**(A)** The distribution of copy number alterations (from GISTIC analysis) of the indicated genes across TCGA serous ovarian cancer cases (n = 311). **(B)** Total protein lysates were harvested from 11 serous ovarian cancer cells. Protein levels were assessed using the indicated antibodies by Western blotting.  $\alpha/\beta$ -tubulin was a loading control. **(C)** Ovarian cancer cells were treated with a serial dilution of erlotinib for 72 hr prior to cell viability assay. Data are shown as mean  $\pm$  SD of three independent experiments in triplicate. *Left*, cell lines that showed  $\geq 50\%$  viability inhibition after 50  $\mu\text{M}$  erlotinib treatment were defined as “sensitive”. *Right*, cell lines whose viability inhibition did not reach 50% were “resistant”. \*, p<0.05; \*\*, p<0.005; \*\*\*, p<0.001; #, p<0.0001 compared with DMSO control using ordinary one-way ANOVA with Tukey’s multiple comparison test. **(D)** Two erlotinib-resistant cell lines (DOV13 and FUOV1) and two erlotinib-sensitive cell lines (SKOV3 and OVCAR3) were treated with 10  $\mu\text{M}$  erlotinib. Western blotting was performed to confirm inhibition efficiency. Representative blots of three independent experiments are shown. The numbers below the blots indicate the mean densitometry values normalized to those of  $\alpha/\beta$ -tubulin of the three experiments.

**A**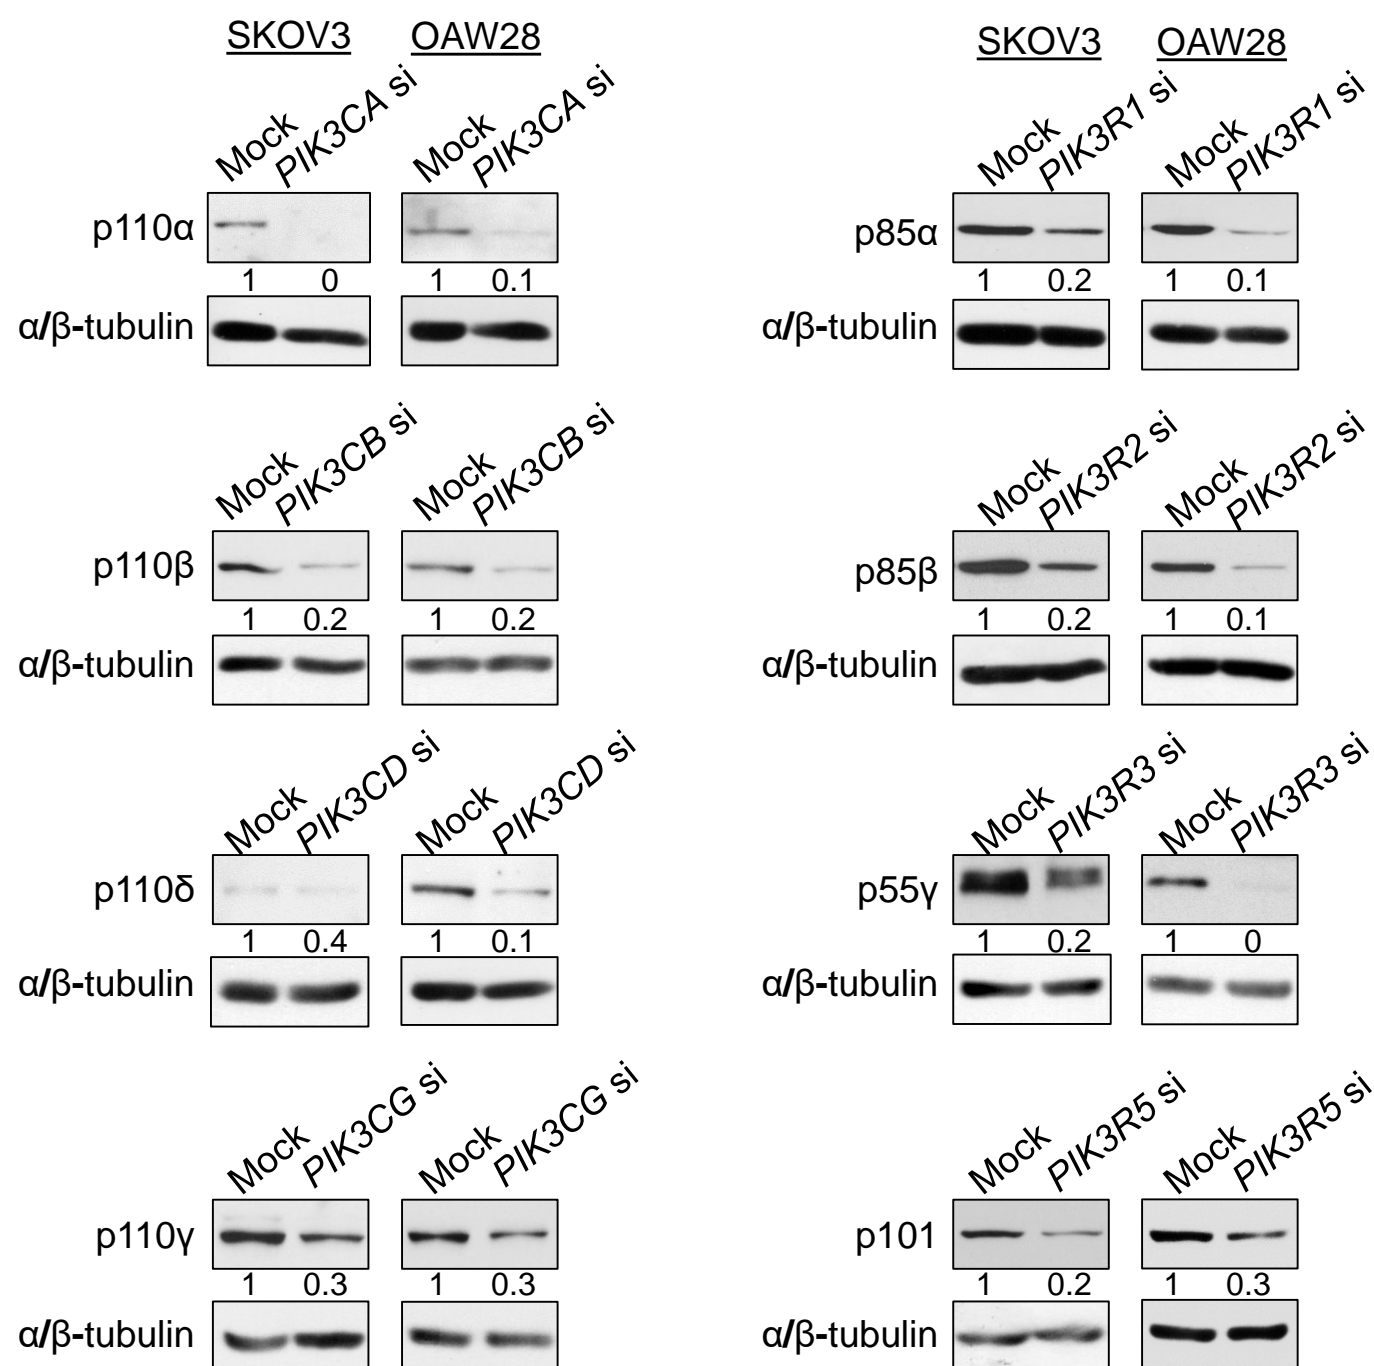**B**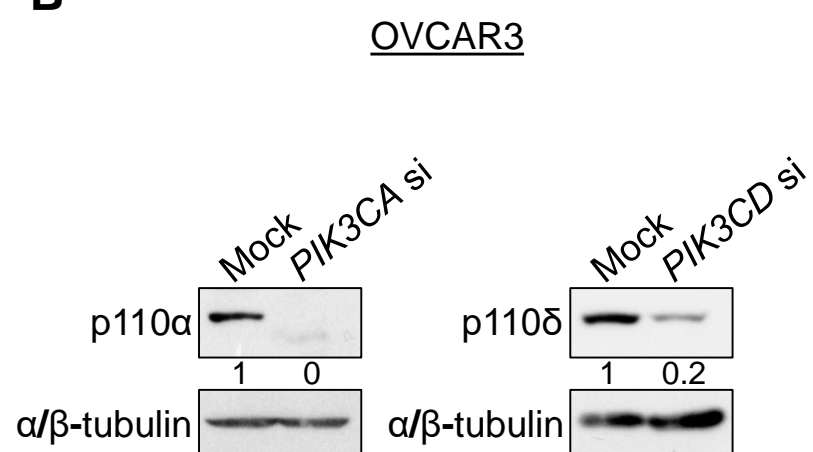**C**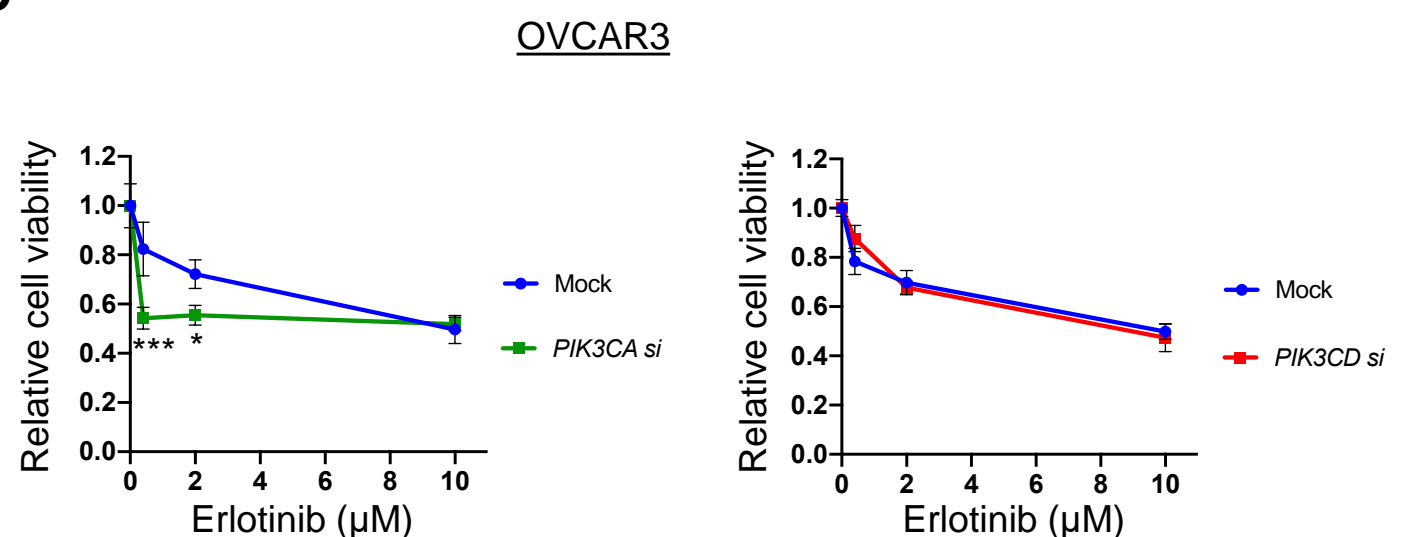

**Supplementary Figure 2. Verification of the efficiency of siRNAs targeting the PI3K isoforms and the effects of siRNA on erlotinib responses of ovarian cancer cell lines.**

(A) SKOV3 and OAW28 cells or (B) OVCAR3 cells were transfected with siRNA for 72 hr and Western blotting was performed to evaluate knockdown efficiency. Representative blots of three independent experiments are shown. The numbers below the blots indicate the mean densitometry values normalized to those of α/β-tubulin of the three experiments. (C) OVCAR3 cells transfected with siRNA for 72 hr were treated with erlotinib for another 72 hr prior to viability assays. Data are shown as mean ± SD of three independent experiments in triplicate. \*, p<0.05; \*\*\*, p<0.001 by two-way ANOVA with Sidak's multiple comparison test.

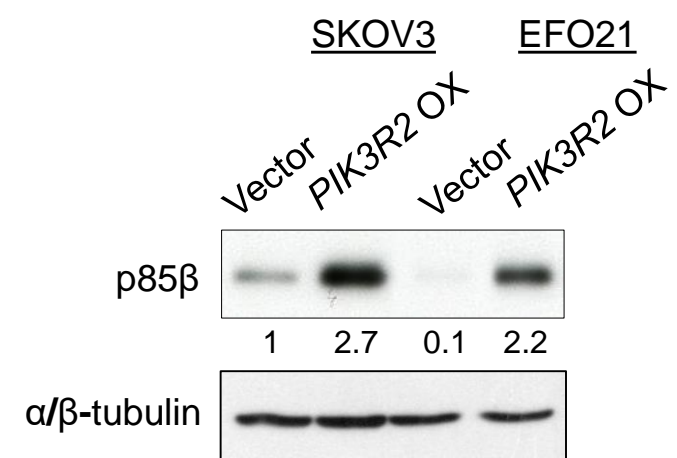

**Supplementary Figure 3. Verification of *PIK3R2* overexpression.** *PIK3R2* expression plasmid (OX) or empty vector was introduced into SKOV3 or EFO21 cells. After 72 hr, Western blotting was performed to evaluate overexpression efficiency.

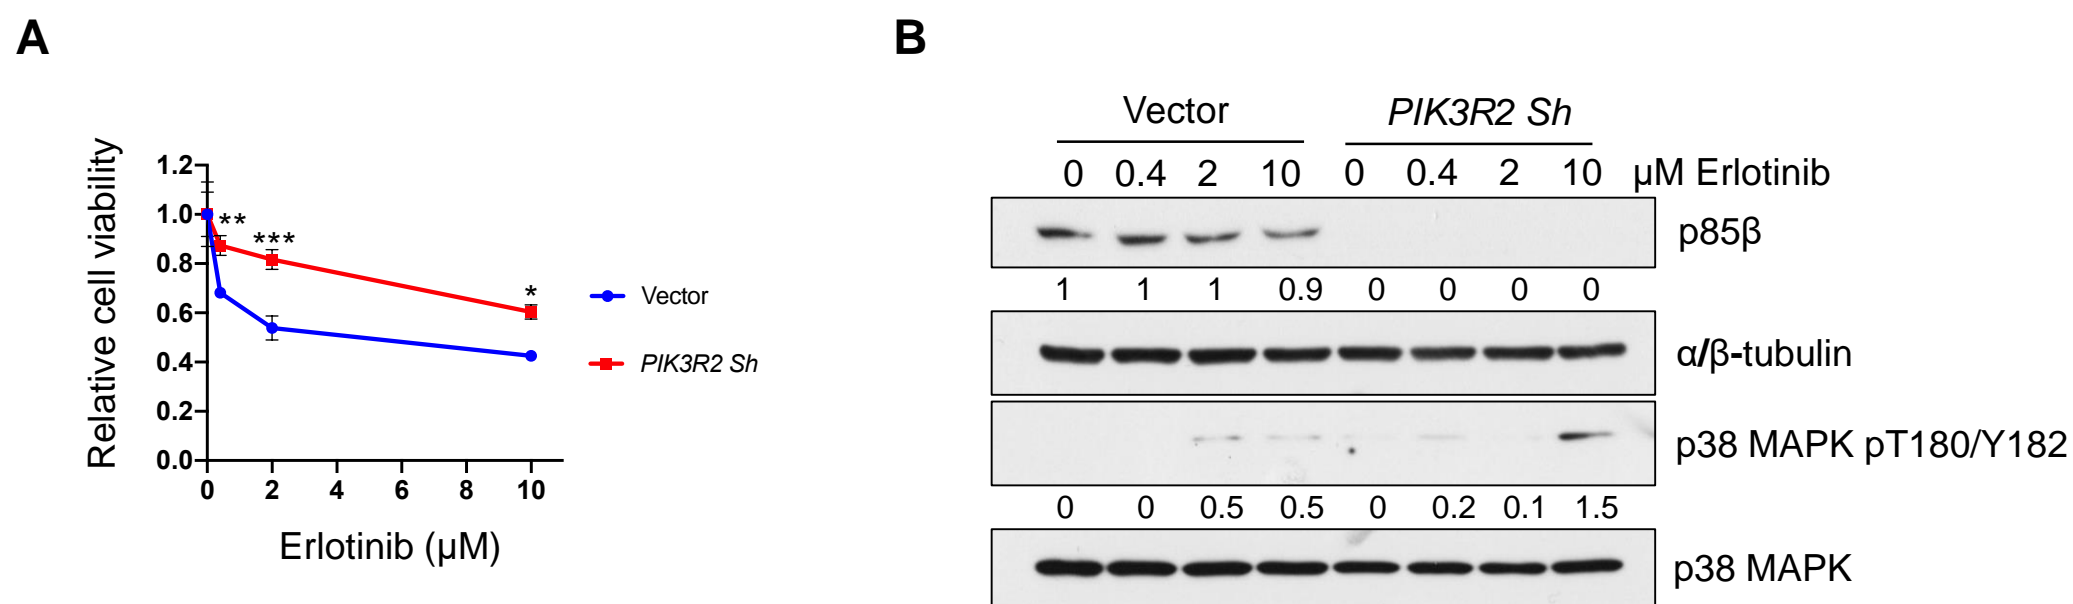

**Supplementary Figure 4. Cells with shRNA-mediated *PIK3R2* knockdown, which have reduced response to erlotinib, show p38 MAPK activation upon erlotinib treatment. (A-B)** SKOV3 cells stably expressing vector control or *PIK3R2* shRNA (sh) upon increasing doses of erlotinib treatment for 72 hr were subjected to (A) in vitro cell viability assay or (B) Western blotting. Cell viability data are shown as mean  $\pm$  SD of three independent experiments in triplicate. \*,  $p < 0.05$ ; \*\*,  $p < 0.005$ ; \*\*\*,  $p < 0.001$  by two-way ANOVA with Sidak's multiple comparison test. Representative blots of three independent experiments are shown. The numbers below the blots indicate the mean densitometry values normalized to those of  $\alpha/\beta$ -tubulin or total p38 MAPK of the three experiments.

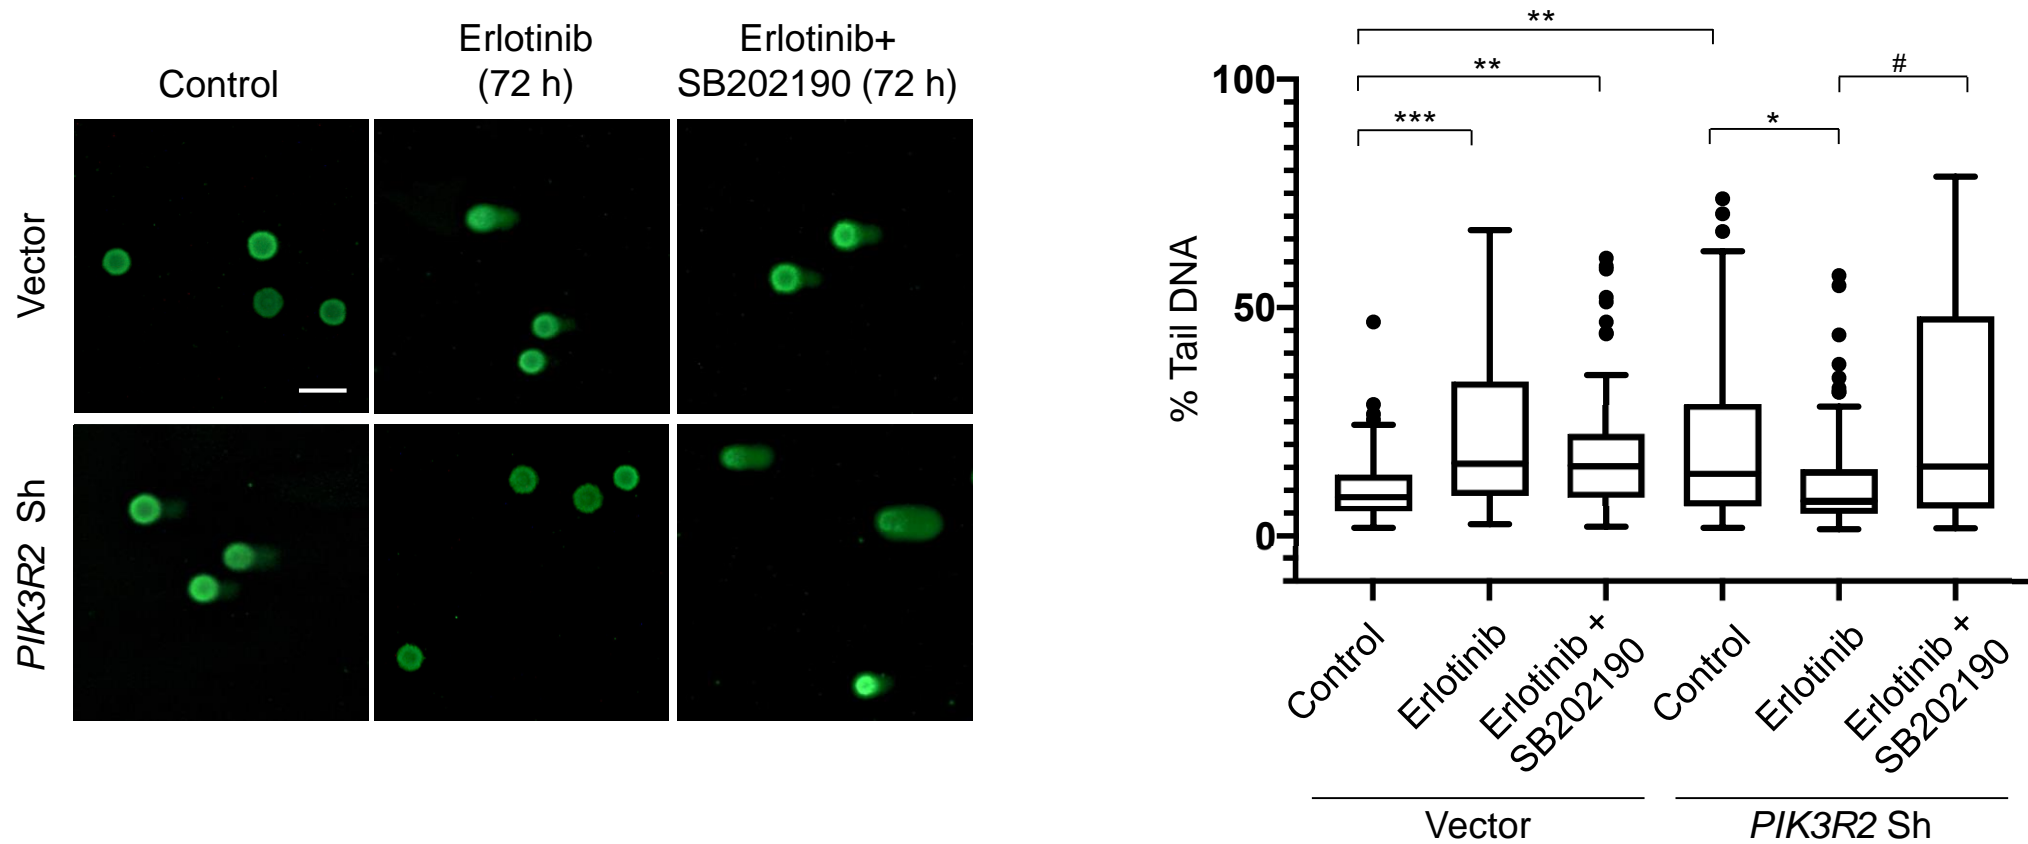

**Supplementary Figure 5. Erlotinib reduces the amount of unrepaired DNA in *PIK3R2*-depleted cells. This reduction is reversed by p38 MAPK inhibitor SB202190.**

SKOV3 cells stably expressing *PIK3R2* shRNA or vector control were treated with erlotinib alone (10  $\mu$ M) or in combination with SB202190 (10  $\mu$ M) for 72 hr. DNA damage was visualized by comet assay (*left*). Scale bar, 100  $\mu$ m. The amount of damaged DNA was expressed as percentage of DNA in comet tail (% tail DNA) (*right*). The box and whisker plot was plotted by Graphpad Prism software using the Tukey method. \*,  $p < 0.05$ ; \*\*\*,  $p < 0.001$ ; #,  $p < 0.0001$  using ordinary one-way ANOVA for comparison within groups (mock or *PIK3R2* shRNA) and two-way ANOVA for comparison between groups (mock vs *PIK3R2* shRNA) with Sidak's multiple comparison test.

**Supplementary Table 1.** Sequences of siRNA and shRNA

|       | Gene Symbol   | Target Protein | Sequence              | Catalog number |
|-------|---------------|----------------|-----------------------|----------------|
| siRNA | <i>PIK3CA</i> | p110 $\alpha$  | GUGGUAAGUCCAGAUUA     | J-003018-13    |
|       | <i>PIK3CB</i> | p110 $\beta$   | GAUUCAGUUGGAGUGAUU    | J-003019-10    |
|       | <i>PIK3CD</i> | p110 $\delta$  | GCGUGGGCAUCAUCUUUAA   | J-006775-11    |
|       | <i>PIK3CG</i> | p110 $\gamma$  | CCCGAAAGCUUUAGAGUUC   | J-005274-08    |
|       | <i>PIK3R1</i> | p85 $\alpha$   | CCAACAACGGUAUGAAUAA   | J-003020-15    |
|       | <i>PIK3R2</i> | p85 $\beta$    | GCGCCCAGCUUAAGGUCUA   | J-003021-09    |
|       | <i>PIK3R3</i> | p55 $\gamma$   | GAUAUCAAUUCGAGUACAA   | J-019546-05    |
|       | <i>PIK3R5</i> | p101           | CGACAGAGAUCUUCAUCCA   | J-020619-08    |
| shRNA | <i>PIK3R2</i> | p85 $\beta$    | CAGATGAAGCGTACTGCAATT |                |

**Supplementary Table 2.** Antibodies used in this study

| Antibodies                            | Abbreviation            | Source         | Catalog number | Dilution     |                    |
|---------------------------------------|-------------------------|----------------|----------------|--------------|--------------------|
|                                       |                         |                |                | Western blot | Immunofluorescence |
| Anti-phospho-EGFR (Tyr1068)           | EGFR pY1068             | Cell Signaling | 2234           | 1:1000       |                    |
| Anti-EGFR                             | EGFR                    | Epitomics      | 1902-1         | 1:4000       |                    |
| Anti-p110 $\gamma$                    | p110 $\gamma$           | Cell Signaling | 5405           | 1:1000       |                    |
| Anti-p110 $\delta$                    | p110 $\delta$           | Abcam          | ab1678         | 1:2200       |                    |
| Anti-p110 $\beta$                     | p110 $\beta$            | Santa Cruz     | sc-376412      | 1:100        |                    |
| Anti-p110 $\alpha$                    | p110 $\alpha$           | Cell Signaling | 4255           | 1:750        |                    |
| Anti-p101                             | p101                    | EMD Millipore  | 07-281         | 1:3000       |                    |
| Anti-p85 $\beta$                      | p85 $\beta$             | Santa Cruz     | sc-56934       | 1:200        |                    |
| Anti-p85 $\alpha$                     | p85 $\alpha$            | Santa Cruz     | sc-71892       | 1:200        |                    |
| Anti-p55 $\gamma$                     | p55 $\gamma$            | Santa Cruz     | sc-376615      | 1:750        |                    |
| Anti-phospho-AKT (Ser473)             | AKT pS473               | Cell Signaling | 9271           | 1:1000       |                    |
| Anti-phospho-AKT (Thr308)             | AKT pT308               | Santa Cruz     | sc-271966      | 1:1000       |                    |
| Anti-AKT                              | AKT                     | Cell Signaling | 4691           | 1:3000       |                    |
| Anti- $\alpha/\beta$ -tubulin         | $\alpha/\beta$ -tubulin | Cell Signaling | 2148           | 1:5000       |                    |
| Anti-MEK1/2 (Ser217/Ser221)           | MEK1/2 pS217/221        | Cell Signaling | 9154           | 1:1000       |                    |
| Anti-MEK1                             | MEK1                    | Santa Cruz     | 6250           | 1:250        |                    |
| Anti-phospho-p38 (Thr180/Tyr182)      | p38 MAPK pT180/Y182     | cell Signaling | 9211           | 1:1000       |                    |
| Anti-p38 MAPK                         | p38 MAPK                | Cell Signaling | 9212           |              | 1:40               |
| Anti-phospho-SAPK/JNK (Thr183/Tyr185) | JNK pT183/Y185          | Cell Signaling | 9255           | 1:1000       |                    |
| Anti-SAPK/JNK                         | JNK                     | Cell Signaling | 9252           | 1:1000       |                    |



|                                            |                      |                |       |        |       |
|--------------------------------------------|----------------------|----------------|-------|--------|-------|
| Anti-phospho-<br>ERK1/2<br>(Thr202/Tyr204) | ERK1/2<br>pT202/Y204 | Cell Signaling | 9101  | 1:2500 |       |
| Anti- ERK1/2                               | ERK1/2               | Cell Signaling | 9102  | 1:5000 |       |
| Anti-53BP1                                 | 53BP1                | Cell Signaling | 4937  | 1:1000 | 1:75  |
| Anti-RAD51                                 | RAD51                | EMD Millipore  | PC130 | 1:1000 | 1:200 |
| Anti-PARP                                  | PARP                 | Cell Signaling | 9542  | 1:1000 |       |
| Anti-lamin A/C                             | Lamin A/C            | Cell Signaling | 2032  | 1:1000 |       |

**Supplementary Table 3.** Mutation status of *EGFR* and PI3K isoforms across 11 serous ovarian cancer cell lines

|        | <i>EGFR</i> | <i>PIK3CA</i> | <i>PIK3CB</i> | <i>PIK3CD</i> | <i>PIK3CG</i> | <i>PIK3R1</i> | <i>PIK3R2</i> | <i>PIK3R3</i> | <i>PIK3R5</i> | <i>PIK3R6</i> |
|--------|-------------|---------------|---------------|---------------|---------------|---------------|---------------|---------------|---------------|---------------|
| CAOV3  | R255Q       |               |               |               |               |               |               |               |               |               |
| DOV13  |             |               |               |               |               |               |               |               |               |               |
| EFO21  |             |               |               |               |               |               |               |               |               |               |
| FUOV1  |             |               |               |               |               |               |               |               |               |               |
| HEY8A  |             |               |               |               |               |               |               |               |               |               |
| OAW28  |             |               |               |               |               |               |               |               |               |               |
| OVCAR3 |             |               |               |               |               | Splice site*  |               |               |               |               |
| OVCAR4 |             |               | K718R         |               |               |               |               |               |               |               |
| OVCAR5 |             |               |               |               |               |               |               |               |               |               |
| OVCAR8 |             |               |               |               |               |               |               |               |               |               |
| SKOV3  |             | H1047R        |               |               |               |               |               |               |               |               |

Data were extracted from the Cancer Cell Line Encyclopedia (CCLE).

\* The *PIK3R1* splice site mutation leads to exon 13 skipping.
